# Supplementary material
Source: publisher site journal article supplement (https://www.dovepress.com/article/423186)
Supplement: Supplementary file 1 [file get_supplementary_file.php]

**Supplementary Material for**

**Figure S1** Platelets and GE-Platelets aggregation detection. (A) Platelet and (B) GE-Platelets aggregation rate with different volume ratio of ACD added. Data are presented as mean ± SD, ns not significant, n=3. (C) Glycosylation engineering of platelets membrane protein did not affect platelets aggregation. Data are presented as mean ± SD, ns not significant, n=3.

**Figure S2** Pharmacokinetics and circulation retention property of IL10, IL10-NPs, IL10-PNP and IL10-GE-PNPs. Normalized fluorescence blood (n =3).

**Figure S3** Binding function to ECs/SMCs/macrophages in vitro. (A, B) Flow cytometry detected the ratio of CD61+ ECs, (C, D) SMCs and (E, F) macrophages at different time points. Data are presented as mean ± SD, ns not significant, n=3.

**Figure S4** Biocompatibility evaluation in vivo. (A) Cytotoxic effect of different IL10 formulations on macrophages, SMCs and HUVECs. (B) H&E staining images of major organs in different groups 14 days after treatment. (C) Blood test indicators 24 hours after treatment and (D) 14 days after treatment, values were normalized based on the value of the Sham group. Data are presented as mean ± SD. ns not significant.

**Table S1. Pharmacokinetic parameters of different IL10 formulations after intravenous administration.**

| Parametersa | IL10 | IL10-NP | IL10-PNP | IL10-GE-PNP |
| --- | --- | --- | --- | --- |
| Elimination rate constant | 0.042±0.002 | 0.035±0.002 | 0.039±0.002 | 0.036±0.001 |
| T1/2 (h) | 16.37±0.86 | 19.67±0.86 | 17.74±0.97 | 19.54±0.69 |
| AUC0-∞ (pg/mL·h) | 1178.57±136.76 | 3840.90±330.52 | 3145.82±181.89 | 3558.54±67.13 |

a Mice were treated with different IL10 formulations at a dosage of 5μg IL10/kg. Pharmacokinetics parameters were calculated to fit a two-compartment model and a one-way nonlinear model. T1/2, elimination half-time; AUC0-∞, total area under curve. Mean with SD, n = 3.
